# Supplementary material for: GluA3 subunits are required for appropriate assembly of AMPAR GluA2 and GluA4 subunits on cochlear afferent synapses and for presynaptic ribbon modiolar–pillar morphology
Source: eLife journal article supplement (doi:10.7554/elife.80950), 2023-01-17
Supplement: fig1-data1 [file Fig1-data1 - ABR, GluA subunit and isoform expression by immunofluorescence and qRT-PCR in GluA3 WT and KO.xlsx]

## Sheet: Fig.1 WT+GluA3KO ABR RT-PCRdata
WT & GluA3KO
P35 Males	ABRs Click Tresholds	WT							ABRs Click Tresholds	GluA3KO
		Frequencies (kHz)								Frequencies (kHz)									qRT-PCR GRIA3-KO vs. WT Males Calculated by delta, delta CT normalized by 18 S rRNA
	Clicks	4	8	12	16	24	32		Clicks	4	8	12	16	24	32
	30	60	30	40	70	50	70		30	60	50	40	50	60	80				Gria2 flip					Gria2 flop
	15	50	50	60	50	40	70		25	70	40	50	60	70	70					Gria3 KO	Wild type	P value			Gria3 KO	Wild type	P value
	30	60	40	70	70	60	70		25	60	30	50	50	50	90					1.1284	0.5439				0.98673	4.9221
	20	50	50	50	40	60	70		25	60	50	50	60	30	60					1.00196	2.2923				0.98309	1.42314
	25	40	40	40	40	60	70		30	50	60	60	60	60	60					0.99731	2.2853				1.11128	1.21897
	30	55	30	40	70	50	70		20	50	40	60	60	70	80				Mean	1.04256	1.70717			Mean	1.02703	2.5214
	20	45	50	60	50	40	70		25	60	50	50	50	50	80				SD	0.07438	1.00743			SD	0.07298	2.08157
	30	55	45	55	70	55	75		30	55	40	55	60	40	65				n=3					n=3
	15	60	50	50	50	60	70		25	60	35	50	50	50	70				Paired t-test two-tailed			0.4		Paired t-test two-tailed			0.4
	30	55	40	45	40	60	70		25	55	50	45	60	60	65
	30	45	45	50	55	65	75		20	50	55	60	50	65	80				Gria4 flip					Gria4 flop
	25	50	50	40	50	55	65		30	50	40	50	60	70	75					Gria3 KO	Wild type	P value			Gria3 KO	Wild type	P value
	30	50	50	45	55	60	60		35	65	30	40	55	50	80					0.98684	0.51875				0.9987	0.81499
																				1.00046	1.7974				1.00187	2.329
																				1.0099	2.7898				1.1046	1.5066
																			Mean	0.999067	1.70198			Mean	1.03506	1.5502
Mean	25.3846	51.9231	43.8462	49.6154	54.6154	55	69.6154		26.5385	57.3077	43.8462	50.7692	55.7692	55.7692	73.4615				SD	0.011593	1.13853			SD	0.0602471	0.757946
SD	5.70477	6.05693	7.11279	9.08539	11.3445	7.59555	3.64878		4.10657	6.0813	9.02003	6.45879	4.74186	-11.7418	8.85451				n=3					n=3
N	13	13	13	13	13	13	13		13	13	13	13	13	13	13				Mann Whitney test			0.3		Mann Whitney test			0.4
																			Data from PCR acylamide gels					Data from PCR acylamide gels
	ABRs Wave I Amplitude
		WT					GluA3KO												Gria2 flip/flop ratio					Gria4 flip/flop ratio
	dB SPL	Mean	SD	N		dB SPL	Mean	SD	N											WT	GluA3KO	P value			WT	GluA3KO	P value
	35	0.156207	0.234618	13		35	0.779924	0.686745	15											0.702255	0.693983				0.702156	0.697232
	40	0.800949	0.662645	13		40	1.47298	0.487353	15											0.620699	0.687927				0.706711	0.693194
	45	1.40815	0.478358	13		45	1.78524	0.445871	13											0.688761	0.65333				0.705631	0.727355
	50	1.85542	0.717853	13		50	2.08344	0.49204	13										Mean	0.670572	0.678413			Mean	0.704833	0.705927
	55	2.43601	0.737624	13		55	2.23042	0.615623	13										SD	0.02	0.01			SD	0.001	0.01
	60	2.6104	0.680436	13		60	2.35491	0.661744	13										n=3					n=3
	65	3.12594	0.837312	13		65	2.4006	0.619981	13										Paired t-test two-tailed			0.8		Paired t-test two-tailed			0.9
	70	3.53604	0.814312	13		70	2.95649	0.662418	13
	75	3.55479	0.911767	13		75	2.74203	0.692373	13
	80	3.59331	1.03385	13		80	3.11885	0.51475	13
	85	3.88078	0.883446	13		85	3.10309	1.02747	13
	90	3.86151	1.38332	13		90	4.15258	1.28692	13
	ABRs Wave I Latency
		WT					GluA3KO
	dB SPL	Mean	SD	N		dB SPL	Mean	SD	N
	35	1.666	0.26163	13		35	1.81	0.041	13
	40	1.5935	0.324699	13		40	1.74275	0.0694997	13
	45	1.7354	0.067796	13		45	1.71188	0.0822287	13
	50	1.637	0.0792811	13		50	1.62462	0.0695987	13
	55	1.5958	0.084025	13		55	1.61425	0.0718545	13
	60	1.563	0.076704	13		60	1.56812	0.0708024	13
	65	1.53	0.0791518	13		65	1.53725	0.0692877	13
	70	1.4806	0.0653016	13		70	1.51162	0.0649856	13
	75	1.456	0.0555293	13		75	1.43938	0.0494829	13
	80	1.4146	0.0553064	13		80	1.40338	0.0711958	13
	85	1.398	0.0579828	13		85	1.34688	0.0687094	13
	90	1.3488	0.0534575	13		90	1.29038	0.0617436	13

## Sheet: Fig. 1 WT+GluA3KO ABR  stats
WT & GluA3KO
P35 Males	ABRs Click Tresholds
	Two-way ANOVA	Ordinary
	Alpha	0.05
	Source of Variation	% of total variation	P value	P value summary	Significant?
	Interaction	0.3577	0.8879	ns	No
	SPL	73.21	<0.0001	****	Yes
	Mice WTvsKO	0.4119	0.1048	ns	No
	ANOVA table	SS	DF	MS	F (DFn, DFd)	P value
	Interaction	146.2	6	24.36	F (6, 168) = 0.3849	P=0.8879
	SPL	29912	6	4985	F (6, 168) = 78.78	P<0.0001
	Mice WTvsKO	168.3	1	168.3	F (1, 168) = 2.659	P=0.1048
	Residual	10631	168	63.28
	Šídák's multiple comparisons test	Mean Diff.	95.00% CI of diff.	Below threshold?	Summary	Adjusted P Value
	WT-M - GluA3KO-M
	Click	-1.154	-9.628 to 7.320	No	ns	0.9998
	4	-5.385	-13.86 to 3.089	No	ns	0.4681
	8	0	-8.474 to 8.474	No	ns	>0.9999
	12	-1.154	-9.628 to 7.320	No	ns	0.9998
	16	-1.154	-9.628 to 7.320	No	ns	0.9998
	24	-0.7692	-9.243 to 7.705	No	ns	>0.9999
	32	-3.846	-12.32 to 4.628	No	ns	0.8234
	ABRs wave 1 amplitude
	Two-way ANOVA	Ordinary
	Alpha	0.05
	Source of Variation	% of total variation	P value	P value summary	Significant?
	Interaction	4.288	0.0002	***	Yes
	SPL	62.63	<0.0001	****	Yes
	WTvsKO	0.282	0.118	ns	No
	ANOVA table	SS (Type III)	DF	MS	F (DFn, DFd)	P value
	Interaction	22.38	11	2.034	F (11, 292) = 3.398	P=0.0002
	SPL	326.8	11	29.71	F (11, 292) = 49.62	P<0.0001
	WTvsKO	1.471	1	1.471	F (1, 292) = 2.458	P=0.1180
	Residual	174.8	292	0.5987
	Šídák's multiple comparisons test	Predicted (LS) mean diff.	95.00% CI of diff.	Below threshold?	Summary	Adjusted P Value
	WT - GluA3KO
	35	-0.6237	-1.468 to 0.2208	No	ns	0.3417
	40	-0.672	-1.517 to 0.1725	No	ns	0.24
	45	-0.3771	-1.251 to 0.4971	No	ns	0.9453
	50	-0.228	-1.102 to 0.6462	No	ns	0.9993
	55	0.2056	-0.6686 to 1.080	No	ns	0.9997
	60	0.2555	-0.6187 to 1.130	No	ns	0.9978
	65	0.7253	-0.1488 to 1.600	No	ns	0.1907
	70	0.5796	-0.2946 to 1.454	No	ns	0.5065
	75	0.8128	-0.06142 to 1.687	No	ns	0.09
	80	0.4745	-0.3997 to 1.349	No	ns	0.7816
	85	0.7777	-0.09650 to 1.652	No	ns	0.1232
	90	-0.2911	-1.165 to 0.5831	No	ns	0.993
	ABRs wave 1 latency
	Two-way ANOVA	Ordinary
	Alpha	0.05
	Source of Variation	% of total variation	P value	P value summary	Significant?
	Interaction	1.647	0.2679	ns	No
	SPL	63.21	<0.0001	****	Yes
	WTvsKO	0.01553	0.7215	ns	No
	ANOVA table	SS	DF	MS	F (DFn, DFd)	P value
	Interaction	0.1542	11	0.01401	F (11, 288) = 1.228	P=0.2679
	SPL	5.915	11	0.5378	F (11, 288) = 47.11	P<0.0001
	WTvsKO	0.001453	1	0.001453	F (1, 288) = 0.1273	P=0.7215
	Residual	3.288	288	0.01142
	Šídák's multiple comparisons test	Mean Diff.	95.00% CI of diff.	Below threshold?	Summary	Adjusted P Value
	WT - GluA3KO
	35	-0.114	-0.2347 to 0.006723	No	ns	0.0799
	40	-0.04925	-0.1700 to 0.07147	No	ns	0.9634
	45	0.02353	-0.09720 to 0.1442	No	ns	>0.9999
	50	0.01238	-0.1083 to 0.1331	No	ns	>0.9999
	55	-0.01845	-0.1392 to 0.1023	No	ns	>0.9999
	60	-0.005125	-0.1258 to 0.1156	No	ns	>0.9999
	65	-0.00725	-0.1280 to 0.1135	No	ns	>0.9999
	70	-0.03103	-0.1517 to 0.08970	No	ns	0.9994
	75	0.01662	-0.1041 to 0.1373	No	ns	>0.9999
	80	0.01123	-0.1095 to 0.1319	No	ns	>0.9999
	85	0.05112	-0.06960 to 0.1718	No	ns	0.9519
	90	0.05842	-0.06230 to 0.1791	No	ns	0.884
