# Supplementary material for: GluA3 subunits are required for appropriate assembly of AMPAR GluA2 and GluA4 subunits on cochlear afferent synapses and for presynaptic ribbon modiolar–pillar morphology
Source: eLife journal article supplement (doi:10.7554/elife.80950), 2023-01-17
Supplement: fig3-data1 [file Figure 3-source data 1- Data and stats TEM of WT.xlsx]

## Sheet: Fig. 3 TEM WT data
WT	PSD Surface Area (um2)					PSD Volume (um3)					Ribbon Volume (um3)				Ribbon Surface Area (um2)				PSD Linear Length (nm)					Ribbon Major Axis (nm)				Ribbon Circularity				SVs Size/Synapse (nm)
P35 Males	Modiolar-1	Modiolar-2	Pillar			Modiolar-1	Modiolar-2	Pillar			Modiolar	Pillar			Modiolar	Pillar			Modiolar-1	Modiolar-2	Pillar			Modiolar	Pillar			Modiolar	Pillar			Modiolar	Pillar
	0.383185	0.755872	0.449184			0.00795945	0.0171659	0.0103582			0.00287664	0.00144464			0.0948618	0.0557298			1009.72	1160.83	541.592			266.359	303.03			0.56	0.87			30.3959	31.219
	0.309939	0.733929	0.449583			0.0068627	0.0121729	0.00494786			0.0016641	0.00313186			0.077156	0.111238			642.389	489.081	567.635			349.922	93.099			0.303	0.87			30.6862	23.6708
	0.618454	0.362565	0.493247			0.00956798	0.0068627	0.00772127			0.0011191	0.00279277			0.0657207	0.0785006			451.962	655.546	594.874			288.587	132.147			0.73	0.759			34.0328	31.2037
	0.311639	0.531876	0.5202			0.00510425	0.00584438	0.00650605			0.00204206	0.001639			0.102683	0.0607803			564.112	657.332	685.589			290.194	166.05			0.685	0.95			32.4505	32.1359
	0.48918	0.558229	0.308187			0.00957856	0.00646166	0.00387844			0.00182167	0.00156413			0.0850034	0.0572336			677.943	714.194	600.436			208.561	132.489			0.651	0.95			38.4728	30.4002
	0.63574	0.449234	0.350635			0.0272029	0.00463286	0.00295225			0.00294657	0.00159664			0.129806	0.0599781			489.081	578.315	799.878			237.542	177.362			0.404	0.989			39.6491	36.9885
	0.646969		0.381041			0.0120547		0.00389677			0.00124464	0.0021392			0.0413745	0.112835			793.841		371.661			265.105	184.473			0.57	0.946			35.9928	34.5786
	0.485866		0.353037			0.00697599		0.00458889			0.00387483	0.00278012			0.199414	0.0772097			651.491		687.087			364.626	129.07			0.54	0.936			35.6834	38.0089
	0.606238		0.355425			0.00932101		0.00520309			0.00317832	0.00145006			0.11752	0.0692674			832.222		751.258			221.691	240.482			0.561	0.944			38.599	31.5718
	0.811976		0.365665			0.0112287		0.00422596			0.00212877	0.0023032			0.107742	0.0826234			584.766		487.975			223.332	149.18			0.335	0.807			39.0744	33.54
	0.494065		0.425451			0.00421088		0.00459918			0.00128155	0.00452918			0.651773	0.0533903			414.067		724.698			299.339	156.061			0.624	0.853			39.9314	34.2495
			0.404778					0.00370841			0.00873072	0.00271758			0.29031	0.072267			850.795		428.136			294.8	166.773			0.405	0.904			37.4836	35.0532
											0.00256877				0.111271				938.208		639.381			309.722	151.16			0.43	0.916			38.4959	36.1767
											0.00206167				0.0860656				930.147		423.641			191.979	236.826			0.321	0.953			38.1574	32.8918
											0.00419689				0.166308				530.016		384.243			179.978	228.61			0.63	0.933			36.7361	35.987
											0.00180258				0.0933032				835.925		476.896			212.604	234.415			0.574	0.962			36.2415	32.1415
											0.00159819				0.0661894				543.839					187.077				0.64				38.4258	30.2334
											0.0044958				0.133981				432.349					195.128				0.6				29.747
											0.00484738				0.18028				790.085					177.792				0.673				35.6645
											0.00197806				0.142257				416.111					534.783				0.374				34.873
											0.00258909				0.101342				606.936					432.156				0.699				33.5302
											0.00149213				0.0783552									314.652				0.29				37.2517
											0.00783976				0.131702									259.581				0.388				37.885
																								231.462				0.402				37.4438
																								273.602				0.545				34.2817
																								205.941				0.529				35.2778
																								247.796				0.632				33.226
																								341.153				0.544				36.587
																								364.081				0.406
																								218.711				0.373
																								344.94				0.442
																								292.529				0.672
																								282.111				0.499
																								300.85				0.329
																								379.042				0.364
																								245.218				0.459
																								230.419				0.622
																								171.753				0.666
																								180.752				0.662
																								306.756				0.425
																								307.913				0.429
Mean	0.526659	0.565284	0.404703		Mean	0.0100061	0.00885673	0.00521553		Mean	0.00297301	0.0023407		Mean	0.141496	0.0742544		Mean	666	709.216	572.811		Mean	273.916	180.077		Mean	0.511878	0.908875		Mean	35.9384	32.9441
SD	0.155066	0.155237	0.061253		SD	0.00618975	0.00483047	0.00207004		SD	0.00198311	0.00091662		SD	0.123282	0.0200803		SD	186.658	234.583	135.285		SD	75.6988	54.6452		SD	0.129141	0.0619472		SD	2.80258	3.35316
n	11	6	12		n	11	6	12		n	23	12		n	23	12		n	21	6	16		n	41	16		n	41	16		n	28	17

## Sheet: Fig.3 TEM WT stats
WT
P35 Males	PSD Surface Area - one-way ANOVA								Ribbon Surface Area - Modiolar vs Pillar			Ribbon Volume - Modiolar vs Pillar
	ANOVA summary								Mann Whitney test			Mann Whitney test
	F	6.032							P value	0.0021		P value	0.5716
	P value	0.007							Exact or approximate P value?	Exact		Exact or approximate P value?	Exact
	P value summary	**							P value summary	**		P value summary	ns
	Significant diff. among means (P < 0.05)?	Yes							Significantly different (P < 0.05)?	Yes		Significantly different (P < 0.05)?	No
	R squared	0.317							One- or two-tailed P value?	Two-tailed		One- or two-tailed P value?	Two-tailed
									Sum of ranks in column A,B	500 , 130		Sum of ranks in column A,B	431 , 199
	Tukey's multiple comparisons test	Mean Diff.	95.00% CI of diff.	Below threshold?	Summary	Adjusted P Value			Mann-Whitney U	52		Mann-Whitney U	121
	Modiolar-1 vs. Modiolar-2	-0.01089	-0.1589 to 0.1372	No	ns	0.9818
	Modiolar-1 vs. Pillar	0.1497	0.02792 to 0.2715	Yes	*	0.0138
	Modiolar-2 vs. Pillar	0.1606	0.01472 to 0.3064	Yes	*	0.0288			Ribbon Major Axis - Modiolar vs Pillar			Ribbon Circularity - Modiolar vs Pillar
									Mann Whitney test			Mann Whitney test
	PSD Volume - one-way ANOVA								P value	<0.0001		P value	<0.0001
	ANOVA summary								Exact or approximate P value?	Exact		Exact or approximate P value?	Exact
	F	3.337							P value summary	****		P value summary	****
	P value	0.0513							Significantly different (P < 0.05)?	Yes		Significantly different (P < 0.05)?	Yes
	P value summary	ns							One- or two-tailed P value?	Two-tailed		One- or two-tailed P value?	Two-tailed
	Significant diff. among means (P < 0.05)?	No							Sum of ranks in column A,B	1424 , 229		Sum of ranks in column A,B	861 , 792
	R squared	0.2042							Mann-Whitney U	93		Mann-Whitney U	0
	Tukey's multiple comparisons test	Mean Diff.	95.00% CI of diff.	Below threshold?	Summary	Adjusted P Value
	Modiolar-1 vs. Modiolar-2	0.001149	-0.004635 to 0.006934	No	ns	0.8749			SVs Size/synapse Modiolar vs Pillar
	Modiolar-1 vs. Pillar	0.004791	3.322e-005 to 0.009548	Yes	*	0.0482			Mann Whitney test
	Modiolar-2 vs. Pillar	0.003641	-0.002057 to 0.009340	No	ns	0.2687			P value	0.0029
									Exact or approximate P value?	Exact
	PSD Linear Length - one-way ANOVA								P value summary	**
	ANOVA summary								Significantly different (P < 0.05)?	Yes
	F	1.843							One- or two-tailed P value?	Two-tailed
	P value	0.1715							Sum of ranks in column A,B	769 , 266
	P value summary	ns							Mann-Whitney U	113
	Significant diff. among means (P < 0.05)?	No
	R squared	0.08438
	Tukey's multiple comparisons test	Mean Diff.	95.00% CI of diff.	Below threshold?	Summary	Adjusted P Value
	Modiolar-1 vs. Modiolar-2	-43.22	-242.1 to 155.7	No	ns	0.8577
	Modiolar-1 vs. Pillar	93.19	-49.39 to 235.8	No	ns	0.2613
	Modiolar-2 vs. Pillar	136.4	-69.28 to 342.1	No	ns	0.2515
