# Supplementary material for: GluA3 subunits are required for appropriate assembly of AMPAR GluA2 and GluA4 subunits on cochlear afferent synapses and for presynaptic ribbon modiolar–pillar morphology
Source: eLife journal article supplement (doi:10.7554/elife.80950), 2023-01-17
Supplement: fig4-data1 [file Figure 4-source data 1-Data and stats TEM of GluA3KO.xlsx]

## Sheet: Fig. 4 GluA3KO TEM data
GluA3KO	PSD Surface Area (um2)				PSD Volume (um3)				Ribbon Volume (um3)			Ribbon Surface Area (um2)				PSD Linear Length (nm)				Ribbon Major Axis (nm)			Ribbon Circularity			SVs Size/Synapse (nm)
P35 Males	Modiolar-1	Modiolar-2	Pillar		Modiolar-1	Modiolar-2	Pillar		Modiolar	Pillar		Modiolar	Pillar			Modiolar-1	Modiolar-2	Pillar		Modiolar	Pillar		Modiolar	Pillar		Modiolar	Pillar
	0.35516	0.788196	0.466776		0.00442012	0.00884401	0.00691902		0.0019432	0.00338915		0.0867695	0.084634			362.232	553.339	503.952		253.495	163.863		0.931	0.908		27.5546	34.9558
	0.335947	0.473833	0.790638		0.00447844	0.00643999	0.0138056		0.0012578	0.0035938		0.0542729	0.09355			654.935	590.152	629.318		170.653	177.227		0.67	0.915		31.1474	40.0999
	0.803762	0.587879	0.726038		0.0148075	0.00603147	0.01136		0.00169316	0.00444851		0.0489952	0.101331			459.737	538.5	505.317		167.716	150.358		0.643	0.937		33.1416	34.0734
	0.319207	0.432618	0.62068		0.0045698	0.00667747	0.00982724		0.00186322	0.00584967		0.042537	0.090649			619.084	524.444	746.443		208.639	210.41		0.484	0.835		30.2972	37.3383
	0.727463	0.483238	0.672661		0.0112172	0.00616857	0.00972385		0.00403877	0.00532489		0.127312	0.108304			533.528	557.08	791.471		202.469	205.771		0.534	0.738		25.6931	38.3856
	0.475059		0.724656		0.00903202		0.0128147		0.00157367	0.00555431		0.635774	0.119966			646	492.7	789.52		141.708	160.852		0.765	0.89		27.2285	36.0262
	0.770254		0.302999		0.017674		0.00510399		0.00171127	0.0038147		0.0615614	0.906893			618.232		496.905		209.814	529.236		0.47	0.906		31.79	41.2446
	0.528412		0.584566		0.0108276		0.00359819		0.00317498	0.00484715		0.103449	0.0646826			472.668		744.84		194.983	242.065		0.694	0.73		26.6361	40.1934
	0.421829		0.371347		0.00406741		0.00530606		0.00400025	0.00237032		0.47262	0.0723018			456.231		673.811		145.567	159.678		0.722	0.843		30.124	38.2606
	0.522344		0.457477		0.00837392		0.00531818		0.00514193	0.00337986		0.199004	0.0843878			497.177		754.197		239.077	195.008		0.609	0.712		39.5534	39.9902
	0.306835				0.00405522				0.00342831			0.132459				448.28		634.823		177.186	232.102		0.823	0.876		39.6844	40.1169
									0.00512309			0.135257				667.27		574.716		161.084	175.24		0.685	0.824		39.6284	36.6418
									0.00134503			0.0564674				469.715		775.437		157.306	207.271		0.66	0.808		37.6614	39.2832
									0.00285032			0.0825807				630.69		574.869		128.657	154.688		0.777	0.898		40.4048	33.4945
									0.00337186			0.0880526				649.961		803.671		185.869	123.275		0.647	0.917		41.4196	40.3533
									0.00668541			0.145961				430.661		766.014		157.503	162.996		0.798	0.908		40.1589	41.1736
									0.00544283			0.145961				600.398		857.689		122.41	180.963		0.767	0.952		37.9234	33.0982
									0.00545573			0.136921				646.744				130.66			0.934			38.2494	38.9999
									0.00379457			0.114279				641.085				142.702			0.9			38.4268
									0.00302193			0.0862988				527.036				106.831			0.902			36.446
									0.00234929			0.0884896				732.829				221.9			0.755			36.8614
									0.00211738			0.0632107				737.116				156.345			0.808			37.9191
																878.511				108.398			0.953			40.6731
																640.711				291.456			0.622			35.8228
																741.456				139.246			0.851			34.6545
																884.275				356.015			0.503			36.06
																740.76				158.831			0.84			35.1547
																650.751				269.496			0.551			36.6972
																919.646				378.379			0.56			32.5879
																907.224				244.107			0.843
																				172.598			0.775
																				238.095			0.916
																				216.506			0.927
																				236.614			0.837
																				199.12			0.867
																				229.956			0.845
																				191.955			0.868
																				192.274			0.823
																				180.231			0.922
																				353.604			0.669
																				317.118			0.727
																				176.844			0.839
																				145.335			0.937
Mean	0.506025	0.553153	0.571784	Mean	0.00850211	0.0068323	0.00837768	Mean	0.00324473	0.00425724	Mean	0.141283	0.17267		Mean	628.831	542.702	683.705	Mean	199.506	201.824	Mean	0.759372	0.858647	Mean	35.1586	37.985
SD	0.185089	0.143318	0.164757	SD	0.00474041	0.00115182	0.00359692	SD	0.00152603	0.00112854	SD	0.141542	0.258491		SD	147.42	32.932	118.19	SD	65.4863	89.8232	SD	0.137232	0.0743984	SD	4.63734	2.67725
n	11	5	10	n	11	5	10	n	22	10	n	22	10		n	30	6	17	n	43	17	n	43	17	n	29	18

## Sheet: Fig.4 GluA3KO TEM stats
GluA3KO
P35 Males	PSD Surface Area - one-way ANOVA								Ribbon Surface Area - Modiolar vs Pillar			Ribbon Volume - Modiolar vs Pillar
	ANOVA summary								Mann Whitney test			Mann Whitney test
	F	0.4067							P value	0.9131		P value	0.0474
	P value	0.6705							Exact or approximate P value?	Exact		Exact or approximate P value?	Exact
	P value summary	ns							P value summary	ns		P value summary	*
	Significant diff. among means (P < 0.05)?	No							Significantly different (P < 0.05)?	No		Significantly different (P < 0.05)?	Yes
	R squared	0.03416							One- or two-tailed P value?	Two-tailed		One- or two-tailed P value?	Two-tailed
									Sum of ranks in column A,B	360 , 168		Sum of ranks in column A,B	314 , 214
	Tukey's multiple comparisons test	Mean Diff.	95.00% CI of diff.	Below threshold?	Summary	Adjusted P Value			Mann-Whitney U	107		Mann-Whitney U	61
	Modiolar-1 vs. Modiolar-2	-0.04713	-0.2775 to 0.1832	No	ns	0.8661
	Modiolar-1 vs. Pillar	-0.06576	-0.2524 to 0.1209	No	ns	0.6565			Ribbon Major Axis - Modiolar vs Pillar			Ribbon Circularity - Modiolar vs Pillar
	Modiolar-2 vs. Pillar	-0.01863	-0.2526 to 0.2153	No	ns	0.9783			Mann Whitney test			Mann Whitney test
									P value	0.9095		P value	0.0102
	PSD Volume - one-way ANOVA								Exact or approximate P value?	Exact		Exact or approximate P value?	Exact
	ANOVA summary								P value summary	ns		P value summary	*
	F	0.4328							Significantly different (P < 0.05)?	No		Significantly different (P < 0.05)?	Yes
	P value	0.6538							One- or two-tailed P value?	Two-tailed		One- or two-tailed P value?	Two-tailed
	P value summary	ns							Sum of ranks in column A,B	1319 , 511		Sum of ranks in column A,B	1157 , 673.5
	Significant diff. among means (P < 0.05)?	No							Mann-Whitney U	358		Mann-Whitney U	210.5
	R squared	0.03627
	Tukey's multiple comparisons test	Mean Diff.	95.00% CI of diff.	Below threshold?	Summary	Adjusted P Value			SVs Size/synapse Modiolar vs Pillar
	Modiolar-1 vs. Modiolar-2	0.00167	-0.003425 to 0.006765	No	ns	0.6942			Mann Whitney test
	Modiolar-1 vs. Pillar	-0.0001446	-0.004272 to 0.003983	No	ns	0.9958			P value	0.0421
	Modiolar-2 vs. Pillar	-0.001814	-0.006989 to 0.003360	No	ns	0.6591			Exact or approximate P value?	Exact
									P value summary	*
	PSD Linear Length - one-way ANOVA								Significantly different (P < 0.05)?	Yes
	ANOVA summary								One- or two-tailed P value?	Two-tailed
	F	2.69							Sum of ranks in column A,B	603 , 525
	P value	0.0777							Mann-Whitney U	168
	P value summary	ns
	Significant diff. among means (P < 0.05)?	No
	R squared	0.09713
	Tukey's multiple comparisons test	Mean Diff.	95.00% CI of diff.	Below threshold?	Summary	Adjusted P Value
	Modiolar-1 vs. Modiolar-2	86.13	-55.47 to 227.7	No	ns	0.3142
	Modiolar-1 vs. Pillar	-54.87	-151.0 to 41.25	No	ns	0.3595
	Modiolar-2 vs. Pillar	-141	-291.4 to 9.350	No	ns	0.0702
