# Supplementary material for: GluA3 subunits are required for appropriate assembly of AMPAR GluA2 and GluA4 subunits on cochlear afferent synapses and for presynaptic ribbon modiolar–pillar morphology
Source: eLife journal article supplement (doi:10.7554/elife.80950), 2023-01-17
Supplement: fig5-data1 [file Figure 5-source data 1-Data and stats TEM of WT and GluA3KO.xlsx]

## Sheet: Fig. 5 WT+GluA3KO TEM data
WT & GluA3KO	PSD Surface Area (um2)						PSD Volume (um3) Modiolar						PSD Surface Area (um2)			PSD Volume (um3) Pillar				Ribbon Volume (um3)						Ribbon Surface Area (um2)						PSD Linear Length (nm) Modiolar						Ribbon Major Axis (nm)						Ribbon Circularity
P35 Males	WT Modiolar-1	KO Modiolar-1	WT Modiolar-2	KO Modiolar-2			WT Mod-1	KO Mod-1	WT Mod-2	KO Mod-2			WT Pillar	KO Pillar		WT Pillar	KO Pillar			Mod-WT	Mod-KO	Pil-WT	Pil-KO			Mod-WT	Mod-KO	Pil-WT	Pil-KO			WT Modiolar-1	KO Modiolar-1	WT Modiolar-2	KO Modiolar-2			Mod-WT	Mod-KO	Pil-WT	Pil-KO			Mod-WT	Mod-KO	Pil-WT	Pil-KO
	0.383185	0.35516	0.755872	0.788196			0.00442012	0.00442012	0.0171659	0.00691902			0.449184	0.466776		0.0103582	0.00466554			0.00287664	0.0019432	0.00144464	0.00338915			0.0948618	0.0867695	0.0557298	0.084634			1009.72	362.232	1160.83	553.339			266.359	253.495	303.03	163.863			0.56	0.931	0.87	0.908
	0.309939	0.335947	0.733929	0.473833			0.00447844	0.00447844	0.0121729	0.00643999			0.449583	0.790638		0.00494786	0.0138056			0.0016641	0.0012578	0.00313186	0.0035938			0.077156	0.0542729	0.111238	0.09355			642.389	654.935	489.081	590.152			349.922	170.653	93.099	177.227			0.303	0.67	0.87	0.915
	0.618454	0.803762	0.362565	0.587879			0.0148075	0.0148075	0.0068627	0.00603147			0.493247	0.726038		0.00772127	0.01136			0.0011191	0.00169316	0.00279277	0.00444851			0.0657207	0.0489952	0.0785006	0.101331			451.962	459.737	655.546	538.5			288.587	167.716	132.147	150.358			0.73	0.643	0.759	0.937
	0.311639	0.319207	0.531876	0.432618			0.0045698	0.0045698	0.00584438	0.00667747			0.5202	0.62068		0.00650605	0.00982724			0.00204206	0.00186322	0.001639	0.00584967			0.102683	0.042537	0.0607803	0.090649			564.112	619.084	657.332	524.444			290.194	208.639	166.05	210.41			0.685	0.484	0.95	0.835
	0.48918	0.727463	0.558229	0.483238			0.0112172	0.0112172	0.00646166	0.00616857			0.308187	0.672661		0.00387844	0.00972385			0.00182167	0.00403877	0.00156413	0.00532489			0.0850034	0.127312	0.0572336	0.108304			677.943	533.528	714.194	557.08			208.561	202.469	132.489	205.771			0.651	0.534	0.95	0.738
	0.63574	0.475059	0.449234				0.00903202	0.00903202	0.00463286				0.350635	0.724656		0.00295225	0.0128147			0.00294657	0.00157367	0.00159664	0.00555431			0.129806	0.635774	0.0599781	0.119966			489.081	646	578.315	492.7			237.542	141.708	177.362	160.852			0.404	0.765	0.989	0.89
	0.646969	0.770254					0.017674	0.017674					0.381041	0.302999		0.00389677	0.00510399			0.00124464	0.00171127	0.0021392	0.0038147			0.0413745	0.0615614	0.112835	0.906893			793.841	618.232					265.105	209.814	184.473	529.236			0.57	0.47	0.946	0.906
	0.485866	0.528412					0.0108276	0.0108276					0.353037	0.584566		0.00458889	0.00359819			0.00387483	0.00317498	0.00278012	0.00484715			0.199414	0.103449	0.0772097	0.122617			651.491	472.668					364.626	194.983	129.07	242.065			0.54	0.694	0.936	0.73
	0.606238	0.421829					0.00406741	0.00580902					0.355425	0.371347		0.00520309	0.00530606			0.00317832	0.00400025	0.00145006	0.00237032			0.11752	0.47262	0.0692674	0.0723018			832.222	456.231					221.691	145.567	240.482	159.678			0.561	0.722	0.944	0.843
	0.811976	0.522344					0.00837392	0.00837392					0.365665	0.457477		0.00422596	0.00531818			0.00212877	0.00514193	0.0023032	0.00337986			0.107742	0.199004	0.0826234	0.0843878			584.766	497.177					223.332	239.077	149.18	195.008			0.335	0.609	0.807	0.712
	0.494065	0.306835					0.00405522	0.00405522					0.425451			0.00459918				0.00128155	0.00312386	0.00452918				0.651773	0.132459	0.0533903				414.067	448.28					299.339	177.186	156.061	232.102			0.624	0.823	0.853	0.876
													0.404778			0.00370841				0.00873072	0.00512309	0.00271758				0.29031	0.135257	0.072267				850.795	667.27					294.8	161.084	166.773	175.24			0.405	0.685	0.904	0.824
																				0.00256877	0.00134503					0.111271	0.0564674					938.208	469.715					309.722	157.306	151.16	207.271			0.43	0.66	0.916	0.808
																				0.00206167	0.00285032					0.0860656	0.0825807					930.147	630.69					191.979	128.657	236.826	154.688			0.321	0.777	0.953	0.898
																				0.00419689	0.00337186					0.166308	0.0880526					530.016	649.961					179.978	185.869	228.61	123.275			0.63	0.647	0.933	0.917
	PSD Surface Area (um2)						PSD Volume (um3) Modiolar						PSD Surface Area (um2) Pillar			PSD Volume (um3) Pillar				0.00180258	0.00668541					0.0933032	0.145961					835.925	430.661					212.604	157.503	234.415	162.996			0.574	0.798	0.962	0.908
																				0.00159819	0.00544283					0.0661894	0.145961					543.839	600.398					187.077	122.41		180.963			0.64	0.767		0.952
Mean	0.526659	0.506025	0.565284	0.553153		Mean	0.00850211	0.00866044	0.00885673	0.0064473		Mean	0.404703	0.571784	Mean	0.00521553	0.00815234			0.0044958	0.00545573					0.133981	0.136921					432.349	646.744					195.128	130.66					0.6	0.934
SD	0.155066	0.185089	0.155237	0.143318		SD	0.00474041	0.00460462	0.00483047	0.000362683		SD	0.061253	0.156303	SD	0.00198191	0.00376512			0.00484738	0.00379457					0.18028	0.114279					790.085	641.085					177.792	142.702					0.673	0.9
n	11	11	6	5		n	11	11	6	5		n	12	10	n	12	10			0.00197806	0.00302193					0.142257	0.0862988					416.111	527.036					534.783	106.831					0.374	0.902
																				0.00258909	0.00234929					0.101342	0.0884896					606.936	732.829					432.156	221.9					0.699	0.755
																				0.00149213	0.00211738					0.0783552	0.0632107						737.116					314.652	156.345					0.29	0.808
																				0.00783976						0.131702							878.511					259.581	108.398					0.388	0.953
																																	640.711					231.462	291.456					0.402	0.622
																				Ribbon Volume (um3)						Ribbon Surface Area (um2)							741.456					273.602	139.246					0.545	0.851
																																	884.275					205.941	356.015					0.529	0.503
																			Mean	0.00297301	0.00323089	0.0023407	0.00425724		Mean	0.141496	0.141283	0.0742544	0.178463				740.76					247.796	158.831					0.632	0.84
																			SD	0.00198311	0.00156159	0.000877597	0.00107063		SD	0.123282	0.138287	0.0200803	0.256443				650.751					341.153	269.496					0.544	0.551
																			n	23	22	12	10		n	23	22	12	10				919.646					364.081	378.379					0.406	0.56
																																	907.224					218.711	244.107					0.373	0.843
																																						344.94	172.598					0.442	0.775
																																PSD Linear Length (nm) Modiolar						292.529	238.095					0.672	0.916
																																						282.111	216.506					0.499	0.927
																															Mean	666	628.831	709.216	542.702			300.85	236.614					0.329	0.837
																															SD	186.658	147.42	234.583	32.932			379.042	199.12					0.364	0.867
																															n	21	30	6	6			245.218	229.956					0.459	0.845
																																						230.419	191.955					0.622	0.868
																																						171.753	192.274					0.666	0.823
																																						180.752	180.231					0.662	0.922
																																							353.604						0.669
																																							317.118						0.727
																																							176.844						0.839
																																							145.335						0.937
																																						Ribbon Major Axis (nm)						Ribbon Circularity
																																					Mean	272.202	199.506	180.077	201.824		Mean	0.516231	0.759372	0.908875	0.858647		Mean
																																					SD	77.2663	65.4863	54.6452	89.8232		SD	0.130982	0.137232	0.0619472	0.0743984		SD
																																					n	39	43	16	17		n	39	43	16	17		n
[truncated: 4 more columns]

## Sheet: Fig.5 WT+GluA3KO TEM stats
WT & GluA3KO
P35 Males	PSD Surface Area Modiolar - one-way ANOVA								PSD Surface Area Pillar
	ANOVA summary								Mann Whitney test
	F	0.2577							P value	0.0138
	P value	0.8552							Exact or approximate P value?	Exact
	P value summary	ns							P value summary	*
	Significant diff. among means (P < 0.05)?	No							Significantly different (P < 0.05)?	Yes
	R squared	0.02597							One- or two-tailed P value?	Two-tailed
									Sum of ranks in column A,B	101 , 152
	Tukey's multiple comparisons test	Mean Diff.	95.00% CI of diff.	Below threshold?	Summary	Adjusted P Value			Mann-Whitney U	23
	WT Modiolar-1 vs. KO Modiolar-1	0.04837	-0.1370 to 0.2337	No	ns	0.8919
	WT Modiolar-1 vs. WT Modiolar-2	-0.01089	-0.2315 to 0.2097	No	ns	0.9991
	WT Modiolar-1 vs. KO Modiolar-2	0.001246	-0.2332 to 0.2357	No	ns	>0.9999
	KO Modiolar-1 vs. WT Modiolar-2	-0.05926	-0.2799 to 0.1613	No	ns	0.8835
	KO Modiolar-1 vs. KO Modiolar-2	-0.04713	-0.2816 to 0.1873	No	ns	0.9464
	WT Modiolar-2 vs. KO Modiolar-2	0.01213	-0.2511 to 0.2753	No	ns	0.9993
	PSD Volume Modiolar - one-way-ANOVA								PSD Volume Pillar
	ANOVA summary								Mann Whitney test
	F	0.5948							P value	0.0071
	P value	0.6235							Exact or approximate P value?	Exact
	P value summary	ns							P value summary	**
	Significant diff. among means (P < 0.05)?	No							Significantly different (P < 0.05)?	Yes
	R squared	0.05796							One- or two-tailed P value?	Two-tailed
									Sum of ranks in column A,B	98 , 155
	Tukey's multiple comparisons test	Mean Diff.	95.00% CI of diff.	Below threshold?	Summary	Adjusted P Value			Mann-Whitney U	20
	WT Mod-1 vs. KO Mod-1	0.001504	-0.004305 to 0.007313	No	ns	0.8941
	WT Mod-1 vs. WT Mod-2	0.001149	-0.005765 to 0.008063	No	ns	0.9685
	WT Mod-1 vs. KO Mod-2	0.003559	-0.003789 to 0.01091	No	ns	0.5583
	KO Mod-1 vs. WT Mod-2	-0.0003546	-0.007269 to 0.006559	No	ns	0.999
	KO Mod-1 vs. KO Mod-2	0.002055	-0.005293 to 0.009402	No	ns	0.8708
	WT Mod-2 vs. KO Mod-2	0.002409	-0.005840 to 0.01066	No	ns	0.8558
	Ribbon Surface Area Modiolar vs Pillar
	ANOVA summary
	F	1.005
	P value	0.3967
	P value summary	ns
	Significant diff. among means (P < 0.05)?	No
	R squared	0.04566
	Tukey's multiple comparisons test	Mean Diff.	95.00% CI of diff.	Below threshold?	Summary	Adjusted P Value
	Mod-WT vs. Mod-KO	-0.0008327	-0.1161 to 0.1145	No	ns	>0.9999
	Mod-WT vs. Pil-WT	0.0662	-0.07150 to 0.2039	No	ns	0.586
	Mod-WT vs. Pil-KO	-0.03801	-0.1845 to 0.1084	No	ns	0.9025
	Mod-KO vs. Pil-WT	0.06703	-0.07173 to 0.2058	No	ns	0.5822
	Mod-KO vs. Pil-KO	-0.03718	-0.1846 to 0.1103	No	ns	0.9097
	Pil-WT vs. Pil-KO	-0.1042	-0.2698 to 0.06135	No	ns	0.3527
	Ribbon Volume Modiolar vs Pillar
	ANOVA summary
	F	2.788
	P value	0.0478
	P value summary	*
	Significant diff. among means (P < 0.05)?	Yes
	R squared	0.1172
	Tukey's multiple comparisons test	Mean Diff.	95.00% CI of diff.	Below threshold?	Summary	Adjusted P Value
	Mod-WT vs. Mod-KO	-0.0002724	-0.001520 to 0.0009757	No	ns	0.9389
	Mod-WT vs. Pil-WT	0.0006317	-0.0008587 to 0.002122	No	ns	0.6796
	Mod-WT vs. Pil-KO	-0.001285	-0.002870 to 0.0003004	No	ns	0.1521
	Mod-KO vs. Pil-WT	0.000904	-0.0005979 to 0.002406	No	ns	0.3925
	Mod-KO vs. Pil-KO	-0.001013	-0.002609 to 0.0005837	No	ns	0.3459
	Pil-WT vs. Pil-KO	-0.001917	-0.003709 to -0.0001245	Yes	*	0.0315
	PSD Linear Length Modiolar								PSD Linear Length Pillar
	ANOVA summary								Mann Whitney test
	F	1.266							P value	0.0207
	P value	0.2945							Exact or approximate P value?	Exact
	P value summary	ns							P value summary	*
	Significant diff. among means (P < 0.05)?	No							Significantly different (P < 0.05)?	Yes
	R squared	0.06046							One- or two-tailed P value?	Two-tailed
									Sum of ranks in column A,B	208 , 353
	Tukey's multiple comparisons test	Mean Diff.	95.00% CI of diff.	Below threshold?	Summary	Adjusted P Value			Mann-Whitney U	72
	WT Modiolar-1 vs. KO Modiolar-1	37.17	-87.00 to 161.3	No	ns	0.8581
	WT Modiolar-1 vs. WT Modiolar-2	-43.22	-245.2 to 158.8	No	ns	0.9419
	WT Modiolar-1 vs. KO Modiolar-2	123.3	-78.72 to 325.3	No	ns	0.379
	KO Modiolar-1 vs. WT Modiolar-2	-80.38	-275.6 to 114.8	No	ns	0.6976
	KO Modiolar-1 vs. KO Modiolar-2	86.13	-109.0 to 281.3	No	ns	0.65
	WT Modiolar-2 vs. KO Modiolar-2	166.5	-85.45 to 418.5	No	ns	0.309
	Ribbon Major Axis Modiolar vs Pillar
	ANOVA summary
	F	9.879
	P value	<0.0001
	P value summary	****
	Significant diff. among means (P < 0.05)?	Yes
	R squared	0.2107
	Tukey's multiple comparisons test	Mean Diff.	95.00% CI of diff.	Below threshold?	Summary	Adjusted P Value
	Mod-WT vs. Mod-KO	72.7	30.97 to 114.4	Yes	****	<0.0001
	Mod-WT vs. Pil-WT	92.13	36.11 to 148.1	Yes	***	0.0002
	Mod-WT vs. Pil-KO	70.38	15.54 to 125.2	Yes	**	0.006
	Mod-KO vs. Pil-WT	19.43	-35.83 to 74.68	No	ns	0.7957
	Mod-KO vs. Pil-KO	-2.318	-56.38 to 51.74	No	ns	0.9995
	Pil-WT vs. Pil-KO	-21.75	-87.47 to 43.98	No	ns	0.8238
	Ribbon Circularity Modiolar vs Pillar
	ANOVA summary
	F	60
	P value	<0.0001
	P value summary	****
	Significant diff. among means (P < 0.05)?	Yes
	R squared	0.6186
	Tukey's multiple comparisons test	Mean Diff.	95.00% CI of diff.	Below threshold?	Summary	Adjusted P Value
	Mod-WT vs. Mod-KO	-0.2431	-0.3122 to -0.1741	Yes	****	<0.0001
	Mod-WT vs. Pil-WT	-0.3926	-0.4853 to -0.3000	Yes	****	<0.0001
	Mod-WT vs. Pil-KO	-0.3424	-0.4331 to -0.2517	Yes	****	<0.0001
	Mod-KO vs. Pil-WT	-0.1495	-0.2409 to -0.05811	Yes	***	0.0002
	Mod-KO vs. Pil-KO	-0.09927	-0.1887 to -0.009864	Yes	*	0.0232
	Pil-WT vs. Pil-KO	0.05023	-0.05848 to 0.1589	No	ns	0.6248
	SVs Size/PSD Modiolar vs Pillar
	ANOVA summary
	F	6.067
	P value	0.0008
	P value summary	***
	Significant diff. among means (P < 0.05)?	Yes
	R squared	0.1714
	Tukey's multiple comparisons test	Mean Diff.	95.00% CI of diff.	Below threshold?	Summary	Adjusted P Value
	Mod-WT vs. Mod-KO	0.7798	-1.691 to 3.251	No	ns	0.8418
	Mod-WT vs. Pil-WT	2.994	0.1269 to 5.862	Yes	*	0.0372
	Mod-WT vs. Pil-KO	-2.047	-4.864 to 0.7709	No	ns	0.2346
	Mod-KO vs. Pil-WT	2.214	-0.6342 to 5.063	No	ns	0.1829
	Mod-KO vs. Pil-KO	-2.826	-5.625 to -0.02802	Yes	*	0.0468
	Pil-WT vs. Pil-KO	-5.041	-8.195 to -1.887	Yes	***	0.0004
