# Supplementary material for: GluA3 subunits are required for appropriate assembly of AMPAR GluA2 and GluA4 subunits on cochlear afferent synapses and for presynaptic ribbon modiolar–pillar morphology
Source: eLife journal article supplement (doi:10.7554/elife.80950), 2023-01-17
Supplement: fig6-data1 [file Figure 6-source data 1 -Synapse counts for GluA3 WT and KO-Confocal data.xlsx]

## Sheet: Fig. 6, per image
	5 week old males
	Mean #/IHC per image
	Group: number of images, mean, s.d.
	CtBP2, GluA2, GluA4									CtBP2									GluA2, GluA4									CtBP2, GluA2									CtBP2, GluA4
	All		10 kHz		20 kHz		40 kHz			All		10 kHz		20 kHz		40 kHz			All		10 kHz		20 kHz		40 kHz			All		10 kHz		20 kHz		40 kHz			All		10 kHz		20 kHz		40 kHz
	WT	KO	WT	KO	WT	KO	WT	KO		WT	KO	WT	KO	WT	KO	WT	KO		WT	KO	WT	KO	WT	KO	WT	KO		WT	KO	WT	KO	WT	KO	WT	KO		WT	KO	WT	KO	WT	KO	WT	KO
	12.7333	12.1333	12.7333	12.1333	19.5333	18.6	20.7333	21		3.16667	2	3.16667	2	0.75	1.83333	0.166667	0.916667		1.91667	1.16667	1.91667	1.16667	1	1.91667	0.75	0.5		0	0	0	0	0	0.0833333	0	0		0	0	0	0	0	0	0	0
	16.6667	8.46667	16.6667	8.46667	14.9333	19.3333	19.5333	21.0667		1.83333	1.66667	1.83333	1.66667	0.583333	3.83333	0	0.666667		2.16667	1.08333	2.16667	1.08333	0.666667	2.08333	0.25	0.416667		0.0833333	0.0833333	0.0833333	0	0	0.25		0.0833333		0	0.0833333	0	0.0833333	0	0.0833333		0
	19.5333	14.9333	14.3333	14.9333	21.1333	18.3333	20.6	20		2.25	1.91667	2.25	1.91667	0.666667	1.5	0	1.08333		1.91667	0.916667	1.91667	0.916667	1.41667	1.16667	0.333333	0.75		0.0833333	0	0.0833333	0.0833333		0		0.25		0	0.166667	0	0.166667		0.25		0
	14.9333	15.4667	13.75	15.4667	19.2	20.2667	18.4	20.0667		1.25	2.25	1.25	2.25	0.75	0.916667	0.0833333	0.833333		1.58333	1.75	1.58333	1.75	1.75	0.333333	0.583333	0.416667		0	0	0			0		0		0	0	0	0		0.166667
	21.1333	18.6	17.75	5.16667	25.6667	21.4667	17.4	18.2667		0.666667	2.08333	0.666667	2.08333						0.833333	1.41667	0.833333	1.41667						0.0833333	0.0833333	0.0833333							0	0.0833333		0.0833333
	19.2	19.3333	17	12.1667	21.4	19.8	19.2667	15.8667		1.41667	1.83333	1.41667							1.66667	1.91667	1.66667							0	0.25								0	0
	25.6667	18.3333	17.75	15	18	18.75	17.5333	20.3333		0.75	3.83333								1	2.08333								0	0								0	0
	21.4	20.2667	18.4167	15.25	20.8333	19.25	15.1333	19.6667		0.583333	1.5								0.666667	1.16667									0									0.0833333
	20.7333	21.4667		17.0833	20.9167	19.9167	15	17.75		0.666667	0.916667								1.41667	0.333333									0									0.25
	19.5333	19.8		16.6667	20.0833	20.6667	12.5333	17.75		0.75	0.916667								1.75	0.5									0.0833333									0.166667
	20.6	21					18.0833			0.166667	0.666667								0.75	0.416667									0.25									0
	18.4	21.0667					17.8333			0	1.08333								0.25	0.75									0									0
	17.4	20					17.8333			0	0.833333								0.333333	0.416667
	19.2667	20.0667					18.1667			0.0833333									0.583333
	17.5333	18.2667							n	14	13	6	5	4	4	4	4	n	14	13	6	5	4	4	4	4	n	7	12	5	3	2	4	1	4	n	7	12	4	5	2	4	1	3
	15.1333	15.8667							mean	0.970238	1.65385	1.76389	1.98333	0.6875	2.02083	0.0625	0.875	mean	1.20238	1.07051	1.68056	1.26667	1.20833	1.375	0.479167	0.520833	mean	0.0357143	0.0625	0.05	0.0277778	0	0.0833333	0	0.0833333	mean	0	0.0694444	0	0.0666667	0	0.125	0	0
	15	5.16667							sd	0.92946	0.84632	0.871488	0.215703	0.0797856	1.26633	0.0797856	0.173472	sd	0.642772	0.591066	0.463731	0.324893	0.473853	0.800752	0.229482	0.157747	sd	0.0445435	0.0948484	0.0456435	0.0481125	0	0.117851	N/A	0.117851	sd	0	0.0858214	0	0.0697217	0	0.107583	N/A	0
	12.5333	12.1667
	14.3333	15
	13.75	15.25
	17.75	17.0833
	17	16.6667
	17.75	18.75
	18.4167	19.25
	18	19.9167
	20.8333	20.6667
	20.9167	20.3333
	20.0833	19.6667
	18.0833	17.75
	17.8333	17.75
	17.8333
	18.1667
n	32	30	8	10	10	10	14	10
mean	18.0672	17.3494	16.05	13.2333	20.17	19.6383	17.7179	19.1767
sd	2.797	3.81255	2.13478	3.82704	2.73124	0.983915	2.23611	1.69311

## Sheet: Fig. 6, group stats
	5 week old males
	Group means
	two-tailed Mann-Whitney U test
	Mean #/IHC per image						GluA2	CtBP2	CtBP2
		CtBP2, GluA2, GluA4				CtBP2	GluA4	GluA2	GluA4
		All	10 kHz	20 kHz	40 kHz	All	All	All	All
	WT	18.0672	16.05	20.17	17.7179	0.970238	1.20238	0.0357143	0
	KO	17.3494	13.2333	19.6383	19.1767	1.65385	1.07051	0.0625	0.0694444
	p	0.94	0.08	0.41	0.1	0.021	0.67	0.81	0.028
	summary	ns	ns	ns	ns	*	ns	ns	*
	alpha £ 0.05 *; £0.01 **; £0.001 ***
