# Supplementary material for: GluA3 subunits are required for appropriate assembly of AMPAR GluA2 and GluA4 subunits on cochlear afferent synapses and for presynaptic ribbon modiolar–pillar morphology
Source: eLife journal article supplement (doi:10.7554/elife.80950), 2023-01-17
Supplement: fig8-data1 [file Figure 8-source data 1-Synapse volumes and intensities for GluA3 WT and KO-Confocal data.xlsx]

## Sheet: Fig. 8, per image
	5 week old males
	Volume (µm3), mean per image
	CtBP2							GluA2							GluA4
	All		Modiolar		Pillar			All		Modiolar		Pillar			All		Modiolar		Pillar
	WT	KO	WT	KO	WT	KO		WT	KO	WT	KO	WT	KO		WT	KO	WT	KO	WT	KO
	0.128019	0.150222	0.120795	0.16179	0.1349	0.14436		0.436744	0.621003	0.419626	0.651394	0.449812	0.603452		0.379307	0.400588	0.373522	0.433909	0.384553	0.382329
	0.14537	0.121737	0.167928	0.132114	0.126663	0.115252		0.395692	0.346601	0.420338	0.41904	0.376845	0.294859		0.422369	0.34928	0.450766	0.426819	0.398179	0.293104
	0.12972	0.139228	0.130977	0.147168	0.0748669	0.131001		0.433886	0.373502	0.420475	0.40644	0.364042	0.329128		0.397059	0.366563	0.448891	0.385279	0.36811	0.341952
	0.124373	0.114315	0.153093	0.125845	0.0748669	0.104299		0.393588	0.342728	0.572024	0.418706	0.50615	0.278146		0.409558	0.360144	0.540708	0.403411	0.478951	0.320891
	0.147447	0.115163	0.190765	0.134098	0.14111	0.107535		0.534129	0.359527	0.634529	0.416287	0.510362	0.329068		0.506177	0.359623	0.606052	0.410495	0.504987	0.319942
	0.158492	0.120402	0.16911	0.111645	0.158059	0.101134		0.583117	0.371993	0.532179	0.413653	0.508736	0.335723		0.542819	0.363332	0.540748	0.369143	0.486525	0.309124
	0.160626	0.109287	0.14806	0.0826596	0.135248	0.107534		0.560152	0.399707	0.457235	0.421827	0.429229	0.348078		0.54672	0.410799	0.460389	0.414458	0.433801	0.339737
	0.138538	0.104754		0.15476		0.109066		0.481261	0.35153		0.443217		0.337276		0.450813	0.328941		0.436395		0.333141
	0.14727	0.0997863		0.127717		0.14204		0.482207	0.371049		0.422912		0.386415		0.454872	0.362602		0.38738		0.377234
	0.161147	0.128337		0.131167		0.119204		0.515185	0.384719		0.364583		0.330398		0.501916	0.378932		0.361807		0.31749
	0.13958	0.135334						0.440729	0.403005						0.444334	0.381846
	0.132007	0.129845						0.425829	0.349615						0.426918	0.338399
	0.131337	0.123764						0.444904	0.343598						0.441643	0.334603
	0.103357							0.40331							0.441868
n	14	13	7	10	7	10	n	14	13	7	10	7	10	n	14	13	7	10	7	10
mean	0.139092	0.122475	0.15439	0.130896	0.120816	0.118143	mean	0.466481	0.386044	0.493772	0.437806	0.449311	0.357254	mean	0.454741	0.364281	0.488725	0.402909	0.436444	0.333494
sd	0.0159749	0.0142416	0.0239503	0.0224436	0.0328185	0.0157114	sd	0.0612909	0.0734373	0.0866108	0.0776282	0.06247	0.0912073	sd	0.051464	0.0242859	0.0777566	0.0263031	0.054538	0.0283483
	Intensity (a.u.), median per image							Density (Intensity median / Volume median)							GluA4:GluA2 Intensity ratio
	CtBP2		GluA2		GluA4			CtBP2		GluA2		GluA4
	WT	KO	WT	KO	WT	KO		WT	KO	WT	KO	WT	KO		WT	KO
	149250	247811	220136	148109	259998	497454		1.28004e+06	1.8018e+06	526906	249052	763595	1.39393e+06		1.18107	3.35871
	168400	199494	231682	126553	300486	441610		1.23369e+06	1.88516e+06	589321	403034	760466	1.35429e+06		1.29698	3.48953
	136025	195967	215082	127653	207643	461055		1.27657e+06	1.75237e+06	530693	382531	547002	1.36013e+06		0.965413	3.61178
	129547	205306	196727	155398	200655	559860		1.3245e+06	1.98407e+06	531295	382133	513560	1.69948e+06		1.01997	3.60275
	80263	204870	126576	149838	135044	495832		692212	2.13645e+06	248819	474918	287275	1.54873e+06		1.0669	3.30912
	85146	241920	132180	161990	123266	555169		671747	2.31305e+06	229450	473402	235895	1.54097e+06		0.932562	3.42719
	85718	156710	124781	128685	125975	403019		603075	1.64041e+06	238022	337006	239142	982571		1.00957	3.13183
	107423	189056	172273	183704	138284	526115		905912	2.0476e+06	369137	562163	318755	1.75017e+06		0.802703	2.86392
	114747	167968	172702	176625	158510	511582		904267	1.93245e+06	380256	526866	358145	1.50579e+06		0.917826	2.89643
	108446	163822	144504	134296	120258	319112		714325	1.37641e+06	288831	377030	249741	916372		0.832212	2.37618
	151099	153078	170709	106750	127955	259502		1.09354e+06	1.29245e+06	402560	277741	289422	729439		0.74955	2.43094
	147204	132435	183800	98599	131064	227119		1.21682e+06	1.0793e+06	442012	319864	307001	753817		0.713081	2.30346
	135191	160248	183124	94899	130286	226932		1.13525e+06	1.34936e+06	443477	289018	307584	727310		0.711463	2.3913
	171274		223976		180111			1.78693e+06		582156		422441			0.804153
n	14	13	14	13	14	13	n	14	13	14	13	14	13	n	14	13
mean	126410	186053	178447	137931	167110	421874	mean	1.05992e+06	1.73776e+06	414495	388828	400002	1.251e+06	mean	0.928818	3.01486
sd	30161.5	34470.1	36549.3	28027.6	56354.4	123167	sd	330214	368929	127716	97198.4	180386	377321	sd	0.175685	0.499696

## Sheet: Fig. 8, group stats
	5 week old males
	Group means
	two-tailed Mann-Whitney U test
	Volume (µm3)
		CtBP2			GluA2			GluA4
		All	Modiolar	Pillar	All	Modiolar	Pillar	All	Modiolar	Pillar
	WT	0.139092	0.15439	0.120816	0.466481	0.493772	0.449311	0.454741	0.488725	0.436444
	KO	0.122475	0.130896	0.118143	0.386044	0.437806	0.357254	0.364281	0.402909	0.333494
	p	0.008	0.098	0.568	0.0001	0.063	0.0083	4.9e-06	0.0058	0.0004
	summary	**	ns	ns	***	ns	**	***	**	***
	alpha £ 0.05 *; £0.01 **; £0.001 ***
	Intensity (a.u.)					Density (Intensity median / Volume median)					Intensity Ratio
		CtBP2	GluA2	GluA4			CtBP2	GluA2	GluA4			GluA4:GluA2
	WT	126410	178447	167110		WT	1.05992e+06	414495	400002		WT	0.936469
	KO	186053	137931	421874		KO	1.73776e+06	388828	1.251e+06		KO	3.05859
	p	0.0001	0.01	5e-06		p	5e-05	0.63	5e-06		p	6e-07
	summary	***	**	***		summary	***	ns	***		summary	***
	alpha £ 0.05 *; £0.01 **; £0.001 ***					alpha £ 0.05 *; £0.01 **; £0.001 ***					alpha £ 0.05 *; £0.01 **; £0.001 ***
