# Supplementary figures and images for: GluA3 subunits are required for appropriate assembly of AMPAR GluA2 and GluA4 subunits on cochlear afferent synapses and for presynaptic ribbon modiolar–pillar morphology
Source: eLife journal article supplement (doi:10.7554/elife.80950), 2023-01-17

PCR gels

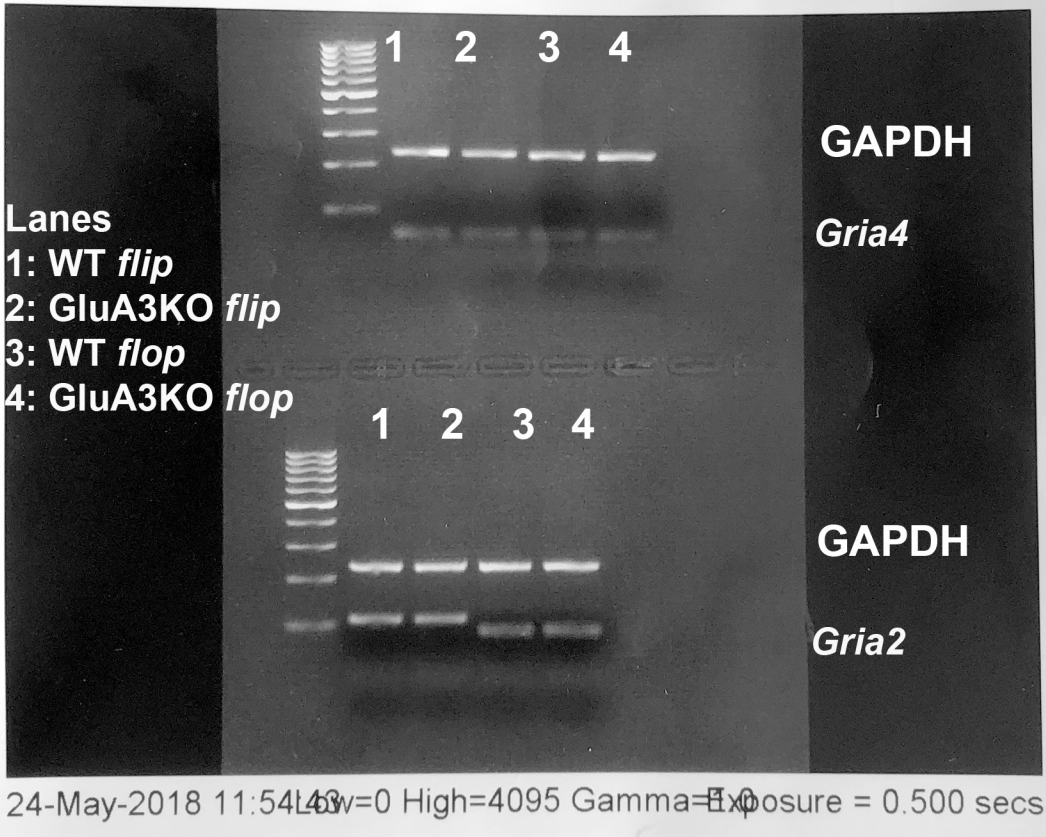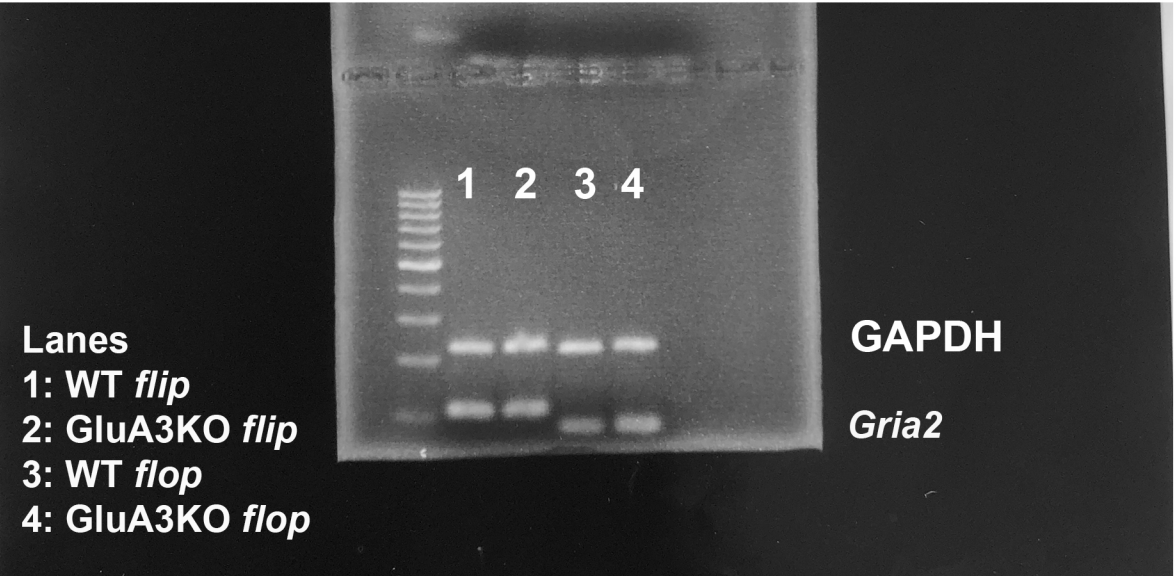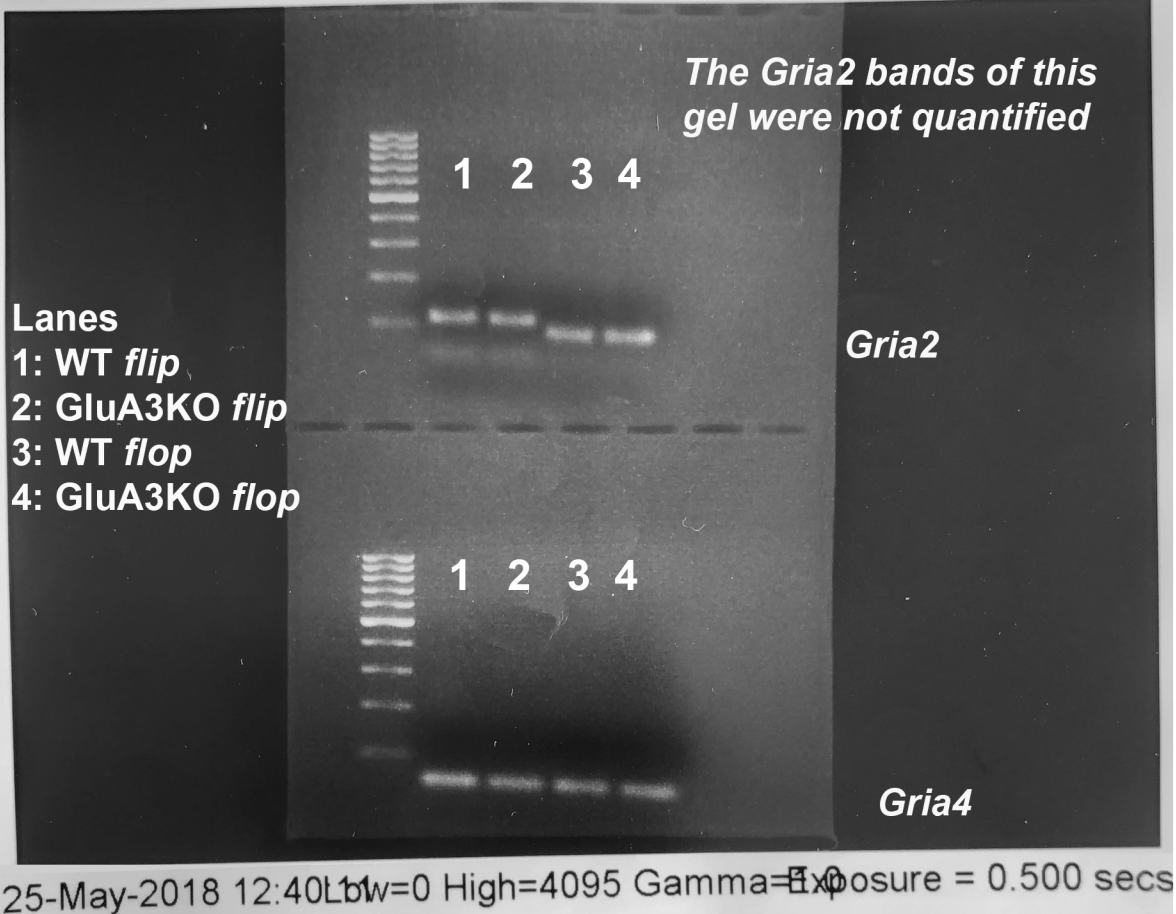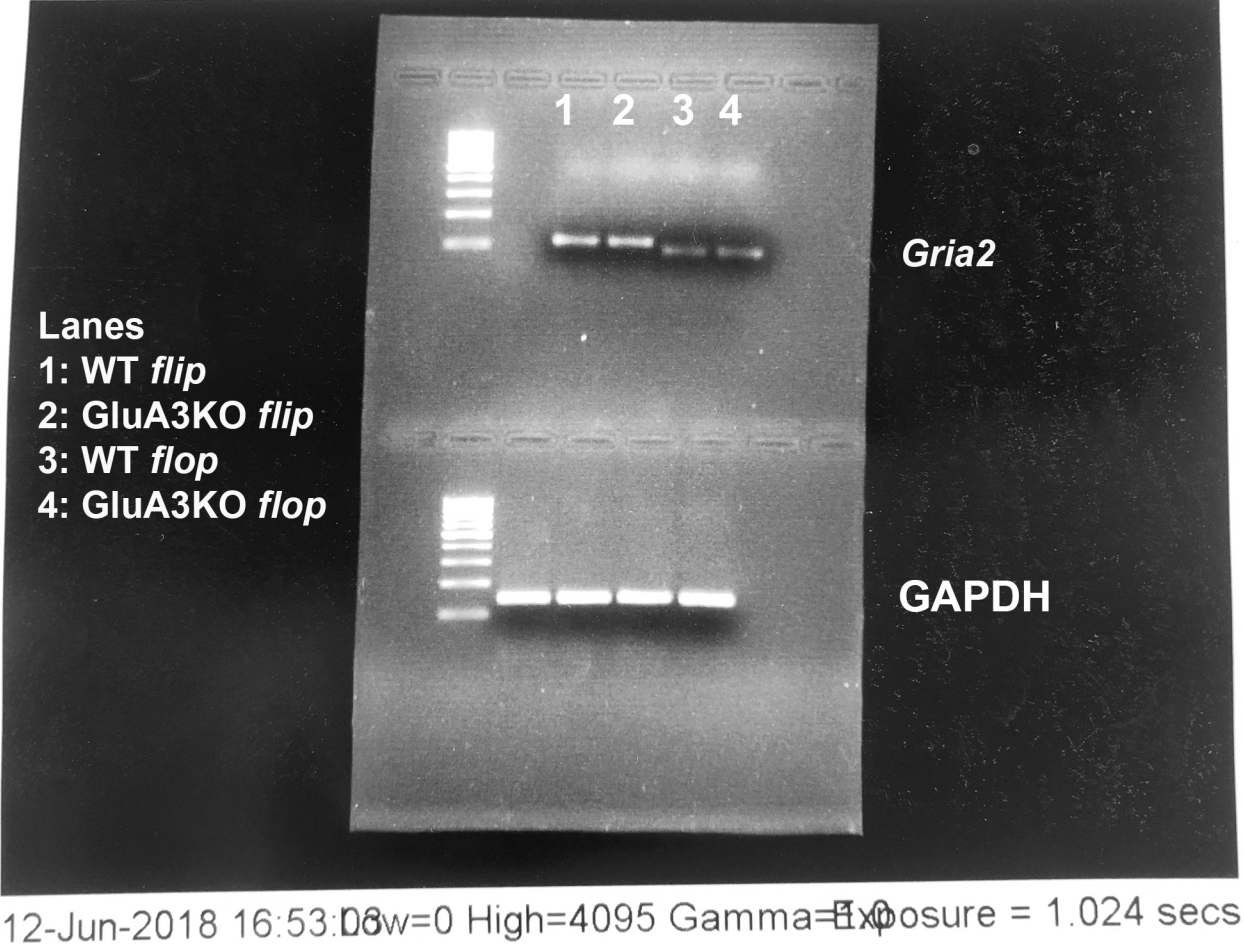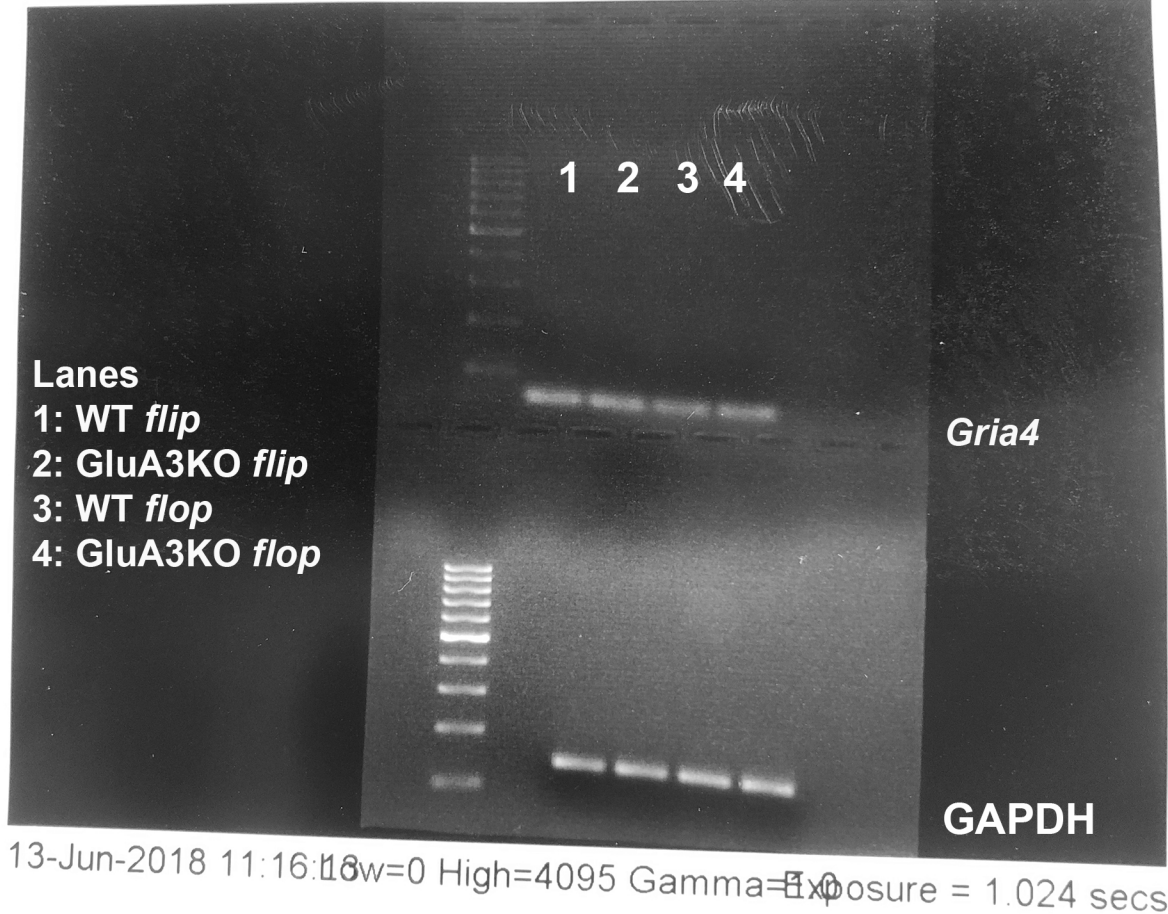

Supplement: fig1-data3 [file elife-80950-fig1-data3-v2.zip]
